# Supplementary material for: Effectiveness and Safety of Aldosterone Antagonist Therapy Use Among Older Patients With Reduced Ejection Fraction After Acute Myocardial Infarction
Source: PubMed Central journal article supplement — J Am Heart Assoc. 2016 Jan 21;5(1):e002612. doi: 10.1161/JAHA.115.002612 (PMC4859378; doi:10.1161/jaha.115.002612), 2016-01-21
Supplement: JAH3-5-e002612-s001.pdf [file JAH3-5-e002612-s001.pdf]

## Supplemental Material

**Table S1. Covariates Entered Into the Propensity Model for Aldosterone Antagonist Use vs. Not**

| <b>Covariate</b>                                                           |
|----------------------------------------------------------------------------|
| Age                                                                        |
| Sex                                                                        |
| Race                                                                       |
| Body mass index                                                            |
| ECG findings (STEMI vs. ST depression vs. transient ST elevation vs. none) |
| HF                                                                         |
| Cardiogenic shock                                                          |
| Heart rate                                                                 |
| Systolic blood pressure                                                    |
| LVEF                                                                       |
| Hypertension                                                               |
| Diabetes                                                                   |
| Peripheral arterial disease                                                |
| Current/recent smoker                                                      |
| Dyslipidemia                                                               |
| Prior MI                                                                   |
| Prior PCI                                                                  |
| Prior CABG                                                                 |
| Prior HF                                                                   |
| Prior stroke                                                               |
| Baseline hemoglobin                                                        |
| Baseline creatinine                                                        |
| Baseline troponin (ratio over the institutional ULN)                       |
| Home aspirin use prior to admission                                        |
| Home ADP receptor inhibitor use prior to admission                         |
| Home warfarin use prior to admission                                       |
| Home beta-blocker use prior to admission                                   |
| Home ACEI/ARB use prior to admission                                       |
| Home aldosterone receptor blocker use prior to admission                   |
| Home statin use prior to admission                                         |
| In-hospital coronary revascularization                                     |
| Discharge ACEI/ARB use                                                     |
| Discharge beta-blocker use                                                 |

---

ACEI indicates angiotensin-converting enzyme inhibitor; ARB, angiotensin receptor blocker; CABG, coronary artery bypass grafting; ECG, electrocardiogram; HF, heart failure; LVEF, left ventricular ejection fraction; MI, myocardial infarction; PCI, percutaneous coronary intervention; STEMI, ST-segment elevation myocardial infarction

**Figure S1. Balance of Covariates Before (Circle) and After (Solid Dot) Inverse Probability-Weighted Propensity Adjustment**

**A) Categorical Variables**

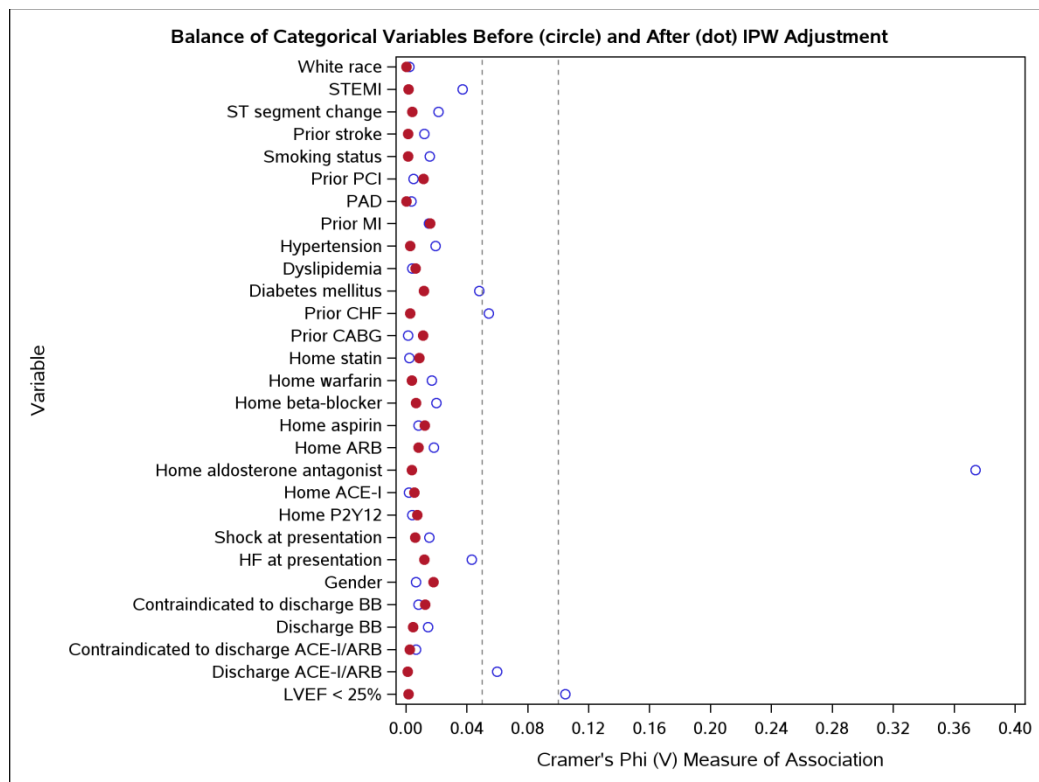

## B) Continuous Variables

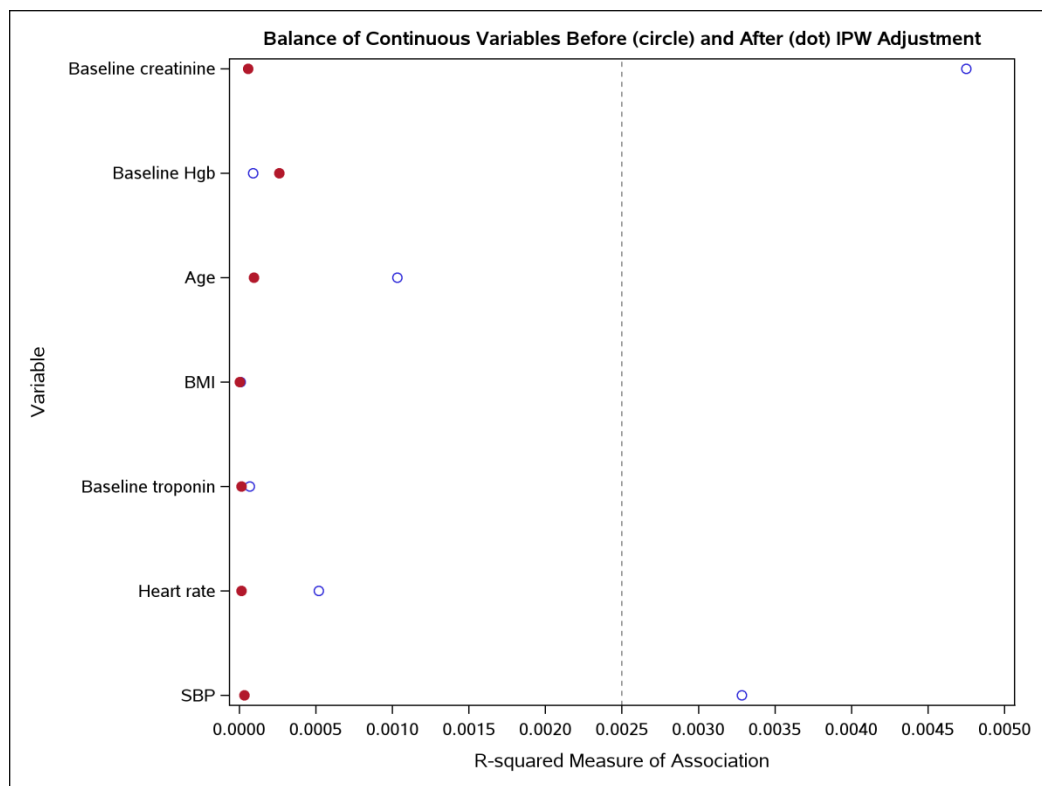

Footnote: Dots to the right of dashed line indicate imbalance. For the Cramer's phi plot, dots to the right of the dashed line at 0.05 indicate medium imbalance, and dots to the right of the dashed line at 0.10 indicate large imbalance. A standardized difference of 10% is equivalent to having a phi coefficient of 0.05 (Austin PC. *Communications in Statistics—Simulation and Computation*®. 2009;38:1228–1234).
